# Supplementary material
Source: publisher site journal article supplement (https://www.dovepress.com/article/231272)
Supplement: Supplementary file 1 [file get_supplementary_file.php]

**Supplementary appendix**

**Supplementary table 1. Anti-diabetic medication being used before the initiation of dulaglutide**

| **Treatment regimen** | **Total (n=120)** | **Total daily insulin dose, IU** |
| --- | --- | --- |
| Insulin | 17 (14.2) |  |
| NPH insulin | 2 (1.7) | 52, 53 |
| Premixed insulinb | 1 (0.8) | 130 |
| Basal insulina + prandial insulinc | 14 (11.7) | 22, 28, 28, 34, 36, 38, 38, 38, 40, 42, 56, 61, 62, 95 |
| Insulin + OADs | 103 (85.8) |  |
| Basal insulin + OADs | 48 (40.0) |  |
| Basal insulin + MET | 2 (1.7) | 20, 40 |
| Basal insulin+ DPP4i | 1 (0.8) | 26 |
| Basal insulin + MET + SU | 11 (9.2) | 18, 18, 20, 26, 30, 30, 34, 34, 36, 36, 38 |
| Basal insulin + MET + DPP4i | 14 (11.7) | 14, 18, 18, 26, 30, 32, 34, 34, 38, 42, 48, 50, 80, 80 |
| Basal insulin + MET + SGLT2i | 4 (3.3) | 24, 40 44, 70 |
| Basal insulin+ SU + DPP4i | 1 (0.8) | 80 |
| Basal insulin + MET + SU +DPP4i | 8 (6.7) | 14, 22, 22, 26, 36, 48, 58, 68 |
| Basal insulin + MET + SU + SGLT2i | 2 (1.7) | 14, 20 |
| Basal insulin + MET + SU +TZD | 1 (0.8) | 50 |
| Basal insulin + MET + DPP4i + TZD | 1 (0.8) | 8 |
| Basal insulin + MET + DPP4i + SGLT2i | 1 (0.8) | 34 |
| Basal insulin + MET + SGLT2i + TZD | 1 (0.8) | 80 |
| Basal insulin+ SU + DPP4i + TZD | 1 (0.8) | 28 |
| NPH insulin + OADs | 7 (5.8) |  |
| NPH insulin + TZD | 1 (0.8) | 18 |
| NPH insulin + MET + SU | 1 (0.8) | 26 |
| NPH insulin + MET + DPP4i | 2 (1.7) | 17, 28 |
| NPH insulin + MET + SGLT2i | 1 (0.8) | 44 |
| NPH insulin + MET + TZD | 1 (0.8) | 160 |
| NPH insulin + DPP4i + TZD | 1 (0.8) | 58 |
| Premixed insulin + OADs | 19 (15.8) |  |
| Premixed insulin+ MET | 5 (4.2) | 30, 30, 72, 90, 98 |
| Premixed insulin+ MET +TZD | 2 (1.7) | 20, 56 |
| Premixed insulin+ SGLT2i | 2 (1.7) | 57, 64 |
| Premixed insulin+ MET +DPP4i | 3 (2.5) | 44, 60, 80 |
| Premixed insulin+ MET + SGLT2i | 2 (1.7) | 38, 70 |
| Premixed insulin+ SU +DPP4i | 1 (0.8) | 30 |
| Premixed insulin+ MET+ SU +DPP4i | 1 (0.8) | 106 |
| Premixed insulin+ MET +DPP4i +TZD | 3 (2.5) | 30, 50, 53 |
| Basal insulin + prandial insulin + OADs | 29 (24.2) |  |
| Basal insulin + prandial insulin+ MET | 6 (5.0) | 46, 46, 55, 56, 64, 74 |
| Basal insulin + prandial insulin+ SGLT2i | 1 (0.8) | 59 |
| Basal insulin + prandial insulin+ TZD | 2 (1.7) | 58, 126 |
| Basal insulin + prandial insulin+ MET+SU | 1 (0.8) | 46 |
| Basal insulin + prandial insulin+ MET+DPP4i | 12 (10.0) | 32, 35, 38, 38, 46, 55, 56, 56, 62, 64, 66, 70 |
| Basal insulin + prandial insulin+ MET + SGLT2i | 3 (2.5) | 67, 88, 90 |
| Basal insulin + prandial insulin+ MET+ SU + DPP4i | 4 (3.3) | 27, 50, 55, 88 |

**Notes:** Data are presented as n (%).

aBasal insulin was glargine, detemir, or degludec.

bPremixed insulin was lispro/NPH or aspart/NPH, administered in the ratio 30:70.

cPrandial insulin was lispro, aspart, or glulisine.

**Abbreviations:** IU, international units; OAD, oral anti-diabetic drug; NPH, neutral protamine hagedorn; MET, metformin; DPP4i, dipeptidyl peptidase-4 inhibitor; SU, sulfonylurea; SGLT2i, sodium-glucose cotransporter 2 inhibitor; TZD, thiazolidinedione.

**Supplementary table 2. Anti-diabetic medications used alongside dulaglutide**

| **Treatment regimen** | **Total (n=120)** |
| --- | --- |
| Insulin | 8 (6.7) |
| Basal insulina | 4 (3.3) |
| Premixed insulinb | 3 (2.5) |
| Basal insulin + prandial insulinc | 1 (0.8) |
| Insulin + MET | 61 (50.8) |
| Basal insulin + MET | 46 (38.3) |
| NPH + MET | 3 (2.5) |
| Premixed insulin + MET | 6 (5.0) |
| Basal insulin + prandial insulin + MET | 6 (5.0) |
| Insulin + MET + SU | 40 (33.3) |
| Basal insulin + MET + SU | 35 (29.2) |
| Premixed insulin + MET + SU | 3 (2.5) |
| Basal insulin + prandial insulin + MET + SU | 2 (1.7) |
| Otherd | 11 (9.2) |

**Notes:** Data are n (%).

aBasal insulin was glargine, detemir, or degludec.

bPremixed insulin was lispro/NPH or aspart/NPH in the ratio 30:70.

cPrandial insulin was lispro, aspart, or glulisine.

dThe others included insulin + MET + TZD, insulin + MET + SGLT2i, insulin + TZD, and insulin + SGLT2i.

**Abbreviations:** MET, metformin; NPH, neutral protamine hagedorn; SU, sulfonylurea; TZD, thiazolidinedione; SGLT2i, sodium-glucose cotransporter 2 inhibitor.

**Supplementary figure 1. Measures of the therapeutic efficacy of dulaglutide between baseline and 3 or 6 months**

(A) HbA1c, (B) fasting plasma glucose, (C) body weight, and (D) total daily insulin dose.Data are presented as mean ± standard error (SE); *** *P* < 0.001 and ** *P* < 0.01 *versus* baseline; ns, not significant.
